# Supplementary material
Source: ML conference proceedings conference paper supplement (https://openreview.net/forum?id=zkGxROm7D3)
Supplement: supplementary_material [file attachment]

## Sheet: Prompt labels
Prompt	Motion class	Motion subclass	Scene label
Flower blooms from bud to flower	Object’s property changes	bloom	nature
the open flower closes	Object’s property changes	close	nature
A crystal clear, deep ruby red wine fills an empty, tall, tapered glass	Object’s property changes	fill	object
empty glass fills with water	Object’s property changes	fill	object
a water fills an empty room	Object’s property changes	fill	indoor
a clean metal lamppost is covering in frost	Object’s property changes	freeze	object
dirty car windshield becomes clean	Object’s property changes	crack	object
cracks appear on a tabletop vase	Object’s property changes	break	indoor
A mountain of garbage grows in an empty field, time-lapse	Object’s property changes	grow	outdoor
the filled bottle pours out all the water	Object’s property changes	pour	object
the clearing of green grass is covering with snow	Object’s property changes	snow	outdoor
time-lapse skyscraper being built from the wasteland up	Object’s property changes	grow	outdoor
an empty street fills with a crowd of people celebrating	Object’s property changes	fill	outdoor
a street crowded with people becomes an empty street	Object’s property changes	leave	outdoor
An open book closes	Object’s property changes	open	object
the dormant volcano is starting to erupt	Object’s property changes	erupt	nature
A lone tree begins to burn	Object’s property changes	burn	object
the wood in the fireplace burns down to nothing	Object’s property changes	blow out	object
an open door closes	Object’s property changes	close	object
a closed box opens	Object’s property changes	open	object
a glass bottle falls and breaks into shatters	Object’s property changes	break	object
the dragon begins to exhale flames	Object’s property changes	exhale flame	nature
an asteroid approaches and collides with Earth, massive explosion	Object’s property changes	explode	nature
A water flooding a dry city street	Object’s property changes	flood	outdoor
the clear blue sky fills with rain clouds and it starts to rain	Object’s property changes	weather change	nature
the big storm stops and the sun comes through the clouds	Object’s property changes	weather change	nature
a sunny weather changes to stormy weather, a tornado forms from the clouds.	Object’s property changes	weather change	nature
the tornado disappears and the weather turns sunny and clear	Object’s property changes	weather change	nature
a landscape time-lapse from sunset to dusk	Object’s property changes	time change	nature
a snow storm turns into a sunny weather	Object’s property changes	weather change	nature
a picturesque sunset, the sun sets over the horizon and it gets completely dark	Object’s property changes	time change	nature
the dark night turns to dawn as the sun rises from the horizon	Object’s property changes	time change	nature
The foggy forest landscape, the fog lifts and it's clear and sunny	Object’s property changes	weather change	nature
a clear sunny weather turns to heavy rain	Object’s property changes	weather change	nature
A sad woman becomes happy, close-up	Object’s property changes	mood change	human
A happy man becomes sad, close-up	Object’s property changes	mood change	human
A neutral man is getting angry, close-up	Object’s property changes	mood change	human
A neutral woman gets surprised, close-up	Object’s property changes	mood change	human
An energetic young boy is getting sleepy, close-up	Object’s property changes	mood change	human
a sleepy girl becomes energetic, close-up	Object’s property changes	mood change	human
a smiling woman gets angry, close-up	Object’s property changes	mood change	human
an angry man begins to smile, close-up	Object’s property changes	mood change	human
a fascinated man becomes a sad man, close-up	Object’s property changes	mood change	human
a fascinated woman begins to smile, close-up	Object’s property changes	mood change	human
a labrador puppy grows into an adult dog	Object’s property changes	grow	animal
a kitten grows into an adult cat	Object’s property changes	grow	animal
a girl grows into a young woman	Object’s property changes	grow	human
a young man turns into an old man	Object’s property changes	grow	human
a young woman turns into an elderly grandmother	Object’s property changes	grow	human
a rose flower grows from a small sprout	Object’s property changes	grow	nature
a plant grows from seed in soil	Object’s property changes	grow	nature
Bean sprouts grow from seeds in soil	Object’s property changes	grow	nature
baby shark grows up to be a big white shark	Object’s property changes	grow	animal
Tiny plant sprout coming out of the ground	Object’s property changes	grow	animal
Cube of ice melts into a puddle of water	Object’s property changes	melt	object
A chocolate bar melts in a pot and turns into liquid chocolate	Object’s property changes	melt	object
A puddle of water evaporates from asphalt	Object’s property changes	evaporate	object
the snowdrift melts and the wet ground becomes visible	Object’s property changes	melt	nature
an iron sword melts and turns to a liquid metal	Object’s property changes	melt	object
Time-lapse of an ice cylinder melting on an asphalt surface	Object’s property changes	melt	object
a knob of butter melts is spread on the piece of bread	Object’s property changes	melt	object
Time-lapse of ice cubes in a pot melting into water and then evaporating into vapor	Object’s property changes	evaporate	object
the ice cubes in the glass melt and turn into water	Object’s property changes	melt	object
the water in the glass freezes and turns to ice	Object’s property changes	freeze	object
a chameleon changes color from green to red	Object’s property changes	color change	animal
a red ball turns into a blue ball	Object’s property changes	color change	object
A blue light switches to a yellow light a room	Object’s property changes	color change	indoor
a blue ink is added to a clean water	Object’s property changes	color change	object
green leaves on the tree turn yellow	Object’s property changes	color change	nature
green leaves on the tree turn red	Object’s property changes	color change	nature
a robot changes color of eyes from red to yellow, close-up	Object’s property changes	color change	object
a robot changes color of eyes from yellow to greed, close-up	Object’s property changes	color change	object
the table lamp on the desk switches from greeen light to purple light	Object’s property changes	color change	object
a graffiti drawing appears on a blank wall	Object’s property changes	color change	outdoor
a TV monitor changes screen color from white to red	Object’s property changes	color change	object
a blank canvas is gradually filled with a beautiful painting	Object’s property changes	color change	object
a cold metal sword glowing red hot over a flame	Object’s property changes	color change	object
the tea is brewed in a glass of clear water	Object’s property changes	color change	object
a green jellyfish turns purple	Object’s property changes	color change	animal
superman flies up from the ground	Object’s position changes	inframe pose change	human
Person sits on the chair and then stands up	Object’s position changes	inframe pose change	human
a sitting cat stands up from the floor	Object’s position changes	inframe pose change	animal
Bird flies up from a branch	Object’s position changes	inframe pose change	animal
a standing woman sits in a chair	Object’s position changes	inframe pose change	human
A ball lying on the table falls down to the floor	Object’s position changes	inframe pose change	object
the girl turns her head from the top to the bottom	Object’s position changes	inframe pose change	human
a man with a clean face applies clown makeup, close-up	Object’s position changes	inframe pose change	human
a girl stands straight and then raises her hands up, frontal view	Object’s position changes	inframe pose change	human
a hot air balloon flying in the sky lands on the ground	Object’s position changes	inframe pose change	object
a dog lies on the grass and then stands up	Object’s position changes	inframe pose change	animal
a standing cat lies down on the lawn	Object’s position changes	inframe pose change	animal
a man picks up a box from the ground	Object’s position changes	inframe pose change	human
a flying bird lands on the branch	Object’s position changes	inframe pose change	animal
the rocket takes off from the ground	Object’s position changes	inframe pose change	object
a bee flies in the air and lands on a growing flower	Object’s position changes	inframe pose change	insect
a kangaroo jumps off the lawn	Object’s position changes	objects appears/disappears	animal
A gopher peeks out of a burrow in the ground and then hides underground	Object’s position changes	objects appears/disappears	animal
A dolphin peering above the surface of the water hides underwater	Object’s position changes	objects appears/disappears	animal
a tiger jumps into a clearing in the jungle	Object’s position changes	objects appears/disappears	animal
A stormtrooper enters an empty room	Object’s position changes	objects appears/disappears	human
first, a empty room is shown, Darth Vader walks in it	Object’s position changes	objects appears/disappears	human
a ladybug siting on a flower flies away	Object’s position changes	objects appears/disappears	animal
first an empty hat is shown, then a rabbit peeks out of the hat	Object’s position changes	objects appears/disappears	animal
first, an empty fox hole is shawn, then fox crawls out of his hole	Object’s position changes	objects appears/disappears	animal
a woman walks into a house	Object’s position changes	objects appears/disappears	human
the apple is covered with a handkerchief	Object’s position changes	objects appears/disappears	object

## Sheet: Manulal prompt splitting
Prompt	Initial state	End state	Transition state
Flower blooms from bud to flower	A bud	A flower	A flower is blooming
the open flower closes	the open flower	the closed flower	the open flower is closing
A crystal clear, deep ruby red wine fills an empty, tall, tapered glass	An empty tall tapered glass	A tall tapered glass with a crystal clear, deep ruby red wine	A crystal clear, deep ruby red wine is filling a tall, tapered glass
empty glass fills with water	an empty glass	a glass with water	a glass is being filling with water
a water fills an empty room	an empty room	a room filled with water	a water is filling a room
a clean metal lamppost is covering in frost	a clean metal lamppost	a metal lamppost covered with frost	a clean metal lamppost is covering in frost
dirty car windshield becomes clean	dirty car windshield	clean car windshield	dirty car windshield is becoming clean
cracks appear on a tabletop vase	a tabletop vase	a cracked tabletop vase	cracks are appearing on a tabletop vase
A mountain of garbage grows in an empty field, time-lapse	an empty field	a field with a mountain of garbage	A mountain of garbage is growing in an empty field, time-lapse
the filled bottle pours out all the water	the bottle filled with the water	an empty bottle	a water pours from the bottle
the clearing of green grass is covering with snow	the clearing of green grass	clearing covered with snow	the clearing of green grass is covering with snow
time-lapse skyscraper being built from the wasteland up	a wasteland	a skyscraper standing on the wasteland	time-lapse skyscraper being built from the ground up
an empty street fills with a crowd of people celebrating	an empty street	a street filled with a crowd of people celebrating	an empty street is filling with a crowd of people celebrating
a street crowded with people becomes an empty street	a street crowded with people	an empty street	people are leaving a cworded street
An open book closes	An open book	An closed book	A book is closing
the dormant volcano is starting to erupt	the dormant volcano	the erupting volcano	the dormant volcano is starting to erupt
A lone tree begins to burn	a lone tree	a burning lone tree	A lone tree begins to burn
the wood in the fireplace burns down to nothing	burning wood in the fireplace	an empty fireplace	the wood in the fireplace is burning down to nothing
an open door closes	an opened door	a closed door	a door is closing
a closed box opens	a closed box	an opened box	a box is opening
a glass bottle falls and breaks into shatters	a glass bottle falls	a glass bottle broken into shatters	a glass bottle is falling and breaking into shatters
the dragon begins to exhale flames	the dragon	the dragon exhaling flames	the dragon begins to exhale flames
an asteroid approaches and collides with Earth, massive explosion	an asteroid approaches the Earth	an asteroid is colliding with Earth, massive explosion	an asteroid is colliding with Earth
A water flooding a dry city street	a dry city street	a city street flooded with a water	A water is flooding a city street
the clear blue sky fills with rain clouds and it starts to rain	the clear blue sky	the sky filled with rain clouds, it rains	the clear blue sky is filling with rain clouds and it starts to rain
the big storm stops and the sun comes through the clouds	the big storm	the sun shines through the clouds	the big storm stops and the sun is coming through the clouds
a sunny weather changes to stormy weather, a tornado forms from the clouds	a sunny weather	a tornado, a stormy weather	a storm clouds cover the sunny sky, a tornado forms.
the tornado disappears and the weather turns sunny and clear	the tornado	a sunny and clear weather	the tornado is disappering and the weather is turning sunny and clear
a landscape time-lapse from sunset to dusk	a sunset landscape	a dusk landscape	a landscape time-lapse from sunset to dusk
a snow storm turns into a sunny weather	a snow storm	a sunny weather	a snow storm is turning into a sunny weather
a picturesque sunset, the sun sets over the horizon and it gets completely dark	a picturesque sunset	a picturesque night, completely dark	a picturesque sunset, the sun is setting over the horizon and it is getting completely dark
the dark night turns to dawn as the sun rises from the horizon	the dark night turns	a dawn, the sun rises from the horizon	the dark night turns to dawn as the sun rises from the horizon
The foggy forest landscape, the fog lifts and it's clear and sunny	The foggy forest landscape	the clear and sunny forest landscape	The forest landscape, the fog is lifting and it's clear and sunny
a clear sunny weather turns to heavy rain	a clear sunny weather	a heavy rain	a clear sunny weather is turning to heavy rain
A sad woman becomes happy, close-up	a sad woman, close-up	a happy woman, close-up	A sad woman is becoming happy, close-up
A happy man becomes sad, close-up	a happy man, close-up	a sad man, close-up	A happy man becomes sad, close-up
A neutral man is getting angry, close-up	A neutral man, close-up	an angry man, close-up	A neutral man is getting angry, close-up
A neutral woman gets surprised, close-up	A neutral woman, close-up	A surprised woman, close-up	A neutral woman is geting surprised, close-up
An energetic young boy is getting sleepy, close-up	An energetic young boy, close-up	A sleepy young boy, close-up	An energetic young boy is getting sleepy, close-up
a sleepy girl becomes energetic, close-up	a sleepy girl, close-up	an energetic girl , close-up	a sleepy girl is becoming energetic, close-up
a smiling woman gets angry, close-up	a smiling woman, close-up	an angry woman, close-up	a smiling woman is getting angry, close-up
an angry man begins to smile, close-up	an angry man, close-up	a smiling man, close-up	an angry man begins to smile, close-up
a fascinated man becomes a sad man, close-up	a fascinated man, close-up	a sad man, close-up	a fascinated man is becoming a sad man, close-up
a fascinated woman begins to smile, close-up	a fascinated woman, close-up	a smiling woman, close-up	a fascinated woman begins to smile, close-up
a labrador puppy grows into an adult dog	a labrador puppy	an adult labrador dog	a labrador puppy is growing into an adult dog
a kitten grows into an adult cat	a kitten	an adult cat	a kitten is growing into an adult cat
a girl grows into a young woman	a girl	a young woman	a girl is growing into a young woman
a young man turns into an old man	a young man	an old man	a young man is turning into an old man
a young woman turns into an elderly grandmother	a young woman turns	an elderly grandmother	a young woman is turning into an elderly grandmother
a rose flower grows from a small sprout	a small sprout	a rose flower	a rose flower is growing from a small sprout
a plant grows from seed in soil	a seed in soil	a plant	a plant is growing from soil
Bean sprouts grow from seeds in soil	a seed in soil	a been sprouts grows from soil	a been plant is growing from soil
baby shark grows up to be a big white shark	baby shark	a big white shark	baby shark is growing up to be a big white shark
Tiny plant sprout coming out of the ground	A ground	Tiny plant sprout in the ground	Tiny plant sprout is coming out of the ground
Cube of ice melts into a puddle of water	Cube of ice	a puddle of water	Cube of ice is melting into a puddle of water
A chocolate bar melts in a pot and turns into liquid chocolate	A chocolate bar	A liquid chocolate	A chocolate bar is melting in a pot and turning into liquid chocolate
A puddle of water evaporates from asphalt	A puddle of water on asphalt	A dry asphalt	A puddle of water is evaporating from asphalt
the snowdrift melts and the wet ground becomes visible	the snowdrift	the wet ground	the snowdrift melting and the wet ground is becoming visible
an iron sword melts and turns to a liquid metal	an iron sword	a liquid metal	an iron sword is melting and turns to a liquid metal
Time-lapse of an ice cylinder melting on an asphalt surface	an ice cylinder stands on an asphalt surface	a puddle of water on an asphalt surface	Time-lapse of an ice cylinder melting on an asphalt surface
a knob of butter melts is spread on the piece of bread	a knob of butter on the piece of bread	the piece of bread covered with liquid butter	a knob of butter is melting and spreading on the piece of bread
Time-lapse of ice cubes in a pot melting into water and then evaporating into vapor	ice cubes in a pot	a pot with boiling water	Time-lapse of ice cubes in a pot melting into water and then evaporating into vapor
the ice cubes in the glass melt and turn into water	the ice cubes in the glass	the glass with a water	the ice cubes in the glass are melting and turning into water
the water in the glass freezes and turns to ice	the glass with the water	the glass with the ice	the water in the glass is freezing and turns to ice
a chameleon changes color from green to red	a green chameleon	a red chameleon	a chameleon is changing color from green to red
a red ball turns into a blue ball	red ball	blue ball	Red ball is turning into blue ball
A blue light switches to a yellow light a room	A room with a blue light	A room with a yellow light	A blue light is switching to a yellow light a room
a blue ink is added to a clean water	a clean water	a water mixed with blue ink	a blue ink is diffusing to clean water
green leaves on the tree turn yellow	green leaves	yellow leaves	green leaves on the tree turn yellow
green leaves on the tree turn red	green leaves	red leaves	green leaves on the tree turn red
a robot changes color of eyes from red to yellow, close-up	a robot with red eyes, close-up	a robot with yellow eyes, close-up	a robot is changing color of eyes from red to yellow, close-up
a robot changes color of eyes from yellow to greed, close-up	a robot with yellow eyes, close-up	a robot with green eyes, close-up	a robot is changing color of eyes from yellow to green, close-up
the table lamp on the desk switches from green light to purple light	a table lamp with a green light on the desk	a table lamp with a purple light on the desk	the table lamp on the desk is switching from green light to purple light
a graffiti drawing appears on a blank wall	a blank wall	a wall with a graffiti drawing	a graffiti drawing appears on a blank wall
a TV monitor changes screen color from white to red	a TV monitor with white screen	a TV monitor with red screen	a TV monitor is changing screen color from white to red
a blank canvas is gradually filled with a beautiful painting	a blank canvas	a canvas with a beautiful painting	a blank canvas is gradually filling with a beautiful painting
a cold metal sword glowing red hot over a flame	a cold metal sword	a red hot metal sword over a flame	a cold metal sword is glowing red hot over a flame
the tea is brewed in a glass of clear water	a glass of clear water	a glass with a tea	the tea is brewing in a glass of clear water
a green jellyfish turns purple	a green jellyfish	a purple jellyfish	a green jellyfish is turning purple
superman flies up from the ground	superman stands the ground	superman flies	superman is flying up from the ground
Person sits on the chair and then stands up	Person sits on the chair	Person stands near the chair	Sitting person gets up from chair
a sitting cat stands up from the floor	a cat sits on the floor	a cat stands on the floor	a cat is standing up from the floor
Bird flies up from a branch	Bird sits on a branch	Bird flies	Bird flies up from branch
a standing woman sits in a chair	a stanging woman	a woman sits in a chair	a stanging woman is siting down in a chair
A ball lying on the table falls down to the floor	A ball lies on the table	A ball lies near the table on the floor	A ball falls down from the table to the floor
the girl turns her head from the top to the bottom	the girl looks up	the girl looks down	the girl is turning her head from the top to the bottom
a man with a clean face applies clown makeup, close-up	a man with a clean face, close-up	a man with a clown makeup, close-up	a man is applying a clown makeup, close-up
a girl stands straight and then raises her hands up, frontal view	a girl stands straight, frontal view	a girl stands with hands raised up, frontal view	a standing girl is raising her hands up, frontal view
a hot air balloon flying in the sky lands on the ground	a hot air balloon flies in the sky	a hot air balloon stands on the ground	a hot air balloon is landing on the ground
a dog lies on the grass and then stands up	a dog lies on the grass	a dog stands on the grass	a dog is standing up from the grass
a standing cat lies down on the lawn	a cat stands on the lawn	a cat lies on the lawn	a cat lying down on the lawn
a man picks up a box from the ground	a man stands near a box on the ground	a man holds a box	a man is picks up a box from the ground
a flying bird lands on the branch	a bird is flying	a bird sits on the branch	a bird is landing on the branch
the rocket takes off from the ground	a rocket stands on the ground	a rocket flies	the rocket is taking off from the ground
a bee flies in the air and lands on a growing flower	a bee flies in the air	a bee sits on a growing flower	a bee approaches a growing flower
a kangaroo jumps off the lawn	A kangaroo stands on the lawn	A lawn	A kangaroo is jumping out of the lawn
A gopher peeks out of a burrow in the ground and then hides underground	A gopher peeks out of a burrow in the ground	a burrow in the ground	A gopher is hiding underground
A dolphin peering above the surface of the water hides underwater	A dolphin peering above the surface	A surface of the water	A dolphin hides under the water surface
a tiger jumps into a clearing in the jungle	a clearing in the jungle	a tiger on a clearing in the jungle	a tiger is jumping into a clearing in the jungle
A stormtrooper enters an empty room	An empty room	A stormtrooper in a room	A stormtrooper is entering an empty room
first, a empty room is shown, Darth Vader walks in it	an empty room	Darth Vader inside a room	Darth Vader is walking is a room
a ladybug siting on a flower flies away	a ladybug sits on a flower	a flower	a ladybug is flying away from a flower
first an empty hat is shown, then a rabbit peeks out of the hat	an empty hat	a rabbit peeks out of the hat	a rabbit is peeking out of the hat
first, an empty fox hole is shawn, then fox crawls out of his hole	an empty fox hole	a fox near a hole	fox is crawling out of his hole
a woman walks into a house	a woman near a house	a house	a woman is entering a house
the apple is covered with a handkerchief	the apple	a handkerchief	a handkerchief is covering the apple

## Sheet: ChatGPT prompt splitting
Prompt	Initial state	End state	Transition state
Flower blooms from bud to flower	a bud	a flower	a flower is blooming
the open flower closes	an open flower	a closed flower	a flower is closing
A crystal clear, deep ruby red wine fills an empty, tall, tapered glass	an empty glass	a glass filled with ruby red wine	a glass is being filled with wine
empty glass fills with water	an empty glass	a glass full of water	a glass is being filled with water
a water fills an empty room	an empty room	a room filled with water	a room is being filled with water
a clean metal lamppost is covering in frost	a clean metal lamppost	a lamppost covered in frost	a lamppost is being covered with frost
dirty car windshield becomes clean	a dirty car windshield	a clean car windshield	a windshield is being cleaned
cracks appear on a tabletop vase	a tabletop vase	a vase with cracks	cracks are appearing on a vase
A mountain of garbage grows in an empty field, time-lapse	an empty field	a field with a mountain of garbage	garbage is accumulating in the field
the filled bottle pours out all the water	a filled bottle	an empty bottle	a bottle is pouring out water
the clearing of green grass is covering with snow	a clearing of green grass	a clearing covered in snow	a clearing is being covered with snow
time-lapse skyscraper being built from the wasteland up	a wasteland	a skyscraper in place of a wasteland	a skyscraper is being constructed
an empty street fills with a crowd of people celebrating	an empty street	a street filled with people celebrating	a crowd is filling the street
a street crowded with people becomes an empty street	a street crowded with people	an empty street	people are leaving the street
An open book closes	an open book	a closed book	a book is closing
the dormant volcano is starting to erupt	a dormant volcano	an erupting volcano	a volcano is starting to erupt
A lone tree begins to burn	a lone tree	a burning tree	a tree is starting to burn
the wood in the fireplace burns down to nothing	wood in a fireplace	a fireplace with ashes	wood is burning down
an open door closes	an open door	a closed door	a door is closing
a closed box opens	a closed box	an open box	a box is opening
a glass bottle falls and breaks into shatters	a glass bottle	shattered pieces of a bottle	a bottle is falling and breaking
the dragon begins to exhale flames	a dragon	a dragon breathing fire	a dragon is exhaling flames
an asteroid approaches and collides with Earth, massive explosion	an approaching asteroid	a massive explosion on Earth	an asteroid colliding with Earth
A water flooding a dry city street	a dry city street	a flooded city street	water is flooding the street
the clear blue sky fills with rain clouds and it starts to rain	a clear blue sky	a sky with rain	rain clouds are gathering
the big storm stops and the sun comes through the clouds	a big storm	the sun coming through the clouds	the storm is stopping
a sunny weather changes to stormy weather, a tornado forms from the clouds	a sunny weather	a tornado forming from clouds	weather is turning stormy
the tornado disappears and the weather turns sunny and clear	a tornado	sunny and clear weather	a tornado is disappearing
a landscape time-lapse from sunset to dusk	a sunset	dusk settling in	the sun is setting
a snow storm turns into a sunny weather	a snowstorm	a sunny weather	a storm is clearing
a picturesque sunset, the sun sets over the horizon and it gets completely dark	a picturesque sunset	complete darkness	the sun is setting over the horizon
the dark night turns to dawn as the sun rises from the horizon	a dark night	dawn	the sun is rising from the horizon
The foggy forest landscape, the fog lifts and it's clear and sunny	a foggy forest landscape	a clear and sunny forest	the fog is lifting
a clear sunny weather turns to heavy rain	clear sunny weather	heavy rain	clouds are gathering
A sad woman becomes happy, close-up	a sad woman, close-up	a happy woman, close-up	a woman is becoming happy, close-up
A happy man becomes sad, close-up	a happy man, close-up	a sad man, close-up	a happy man becoming sad, close-up
A neutral man is getting angry, close-up	a neutral man, close-up	an angry man, close-up	a neutral man becoming angry, close-up
A neutral woman gets surprised, close-up	a neutral woman, close-up	a surprised woman, close-up	a neutral woman becoming surprised, close-up
An energetic young boy is getting sleepy, close-up	an energetic young boy, close-up	a sleepy young boy, close-up	an energetic young boy becoming sleepy, close-up
a sleepy girl becomes energetic, close-up	a sleepy girl, close-up	an energetic girl, close-up	a sleepy girl becoming energetic, close-up
a smiling woman gets angry, close-up	a smiling woman, close-up	an angry woman, close-up	a smiling woman becoming angry, close-up
an angry man begins to smile, close-up	an angry man, close-up	a smiling man, close-up	an angry man beginning to smile, close-up
a fascinated man becomes a sad man, close-up	a fascinated man, close-up	a sad man, close-up	a fascinated man becoming sad, close-up
a fascinated woman begins to smile, close-up	a fascinated woman, close-up	a smiling woman, close-up	a fascinated woman beginning to smile, close-up
a labrador puppy grows into an adult dog	a labrador puppy	an adult labrador dog	a labrador puppy growing into a dog
a kitten grows into an adult cat	a kitten	an adult cat	a kitten growing into a cat
a girl grows into a young woman	a girl	a young woman	a girl growing into a young woman
a young man turns into an old man	a young man	an old man	a young man becoming older
a young woman turns into an elderly grandmother	a young woman	an elderly grandmother	a young woman aging into a grandmother
a rose flower grows from a small sprout	a small sprout	a rose flower	a small sprout growing into a rose
a plant grows from seed in soil	a seed in soil	a plant	a seed growing into a plant
Bean sprouts grow from seeds in soil	seeds in soil	bean sprouts	seeds growing into bean sprouts
baby shark grows up to be a big white shark	a baby shark	a big white shark	a baby shark growing bigger
Tiny plant sprout coming out of the ground	a tiny plant sprout	a plant sprout	a tiny plant sprout emerging from the ground
Cube of ice melts into a puddle of water	a cube of ice	a puddle of water	a cube of ice melting into water
A chocolate bar melts in a pot and turns into liquid chocolate	a chocolate bar in a pot	liquid chocolate	a chocolate bar melting in a pot
A puddle of water evaporates from asphalt	a puddle of water on asphalt	dry asphalt	a puddle of water evaporating from asphalt
the snowdrift melts and the wet ground becomes visible	a snowdrift	wet ground	a snowdrift melting to reveal the ground
an iron sword melts and turns to a liquid metal	an iron sword	liquid metal	an iron sword melting into liquid
Time-lapse of an ice cylinder melting on an asphalt surface	an ice cylinder on asphalt	water on asphalt	an ice cylinder melting on asphalt
A knob of butter melts and is spread on the piece of bread	a knob of butter on bread	melted butter spread on bread	a knob of butter melting on bread
Time-lapse of ice cubes in a pot melting into water and then evaporating into vapor	ice cubes in a pot	water evaporating into vapor	ice cubes melting into water
the ice cubes in the glass melt and turn into water	ice cubes in a glass	water in the glass	ice cubes melting into water
the water in the glass freezes and turns to ice	water in a glass	ice in the glass	water freezing into ice
a chameleon changes color from green to red	a green chameleon	a red chameleon	a chameleon changing color
a red ball turns into a blue ball	a red ball	a blue ball	a red ball changing color
A blue light switches to a yellow light in a room	a blue light in a room	a yellow light in a room	a blue light switching color
a blue ink is added to a clean water	clean water	blue-tinted water	blue ink added to clean water
green leaves on the tree turn yellow	green leaves on a tree	yellow leaves on the tree	green leaves turning yellow
green leaves on the tree turn red	green leaves on a tree	red leaves on the tree	green leaves turning red
a robot changes color of eyes from red to yellow, close-up	a robot with red eyes, close-up	a robot with yellow eyes, close-up	a robot's eyes changing from red to yellow, close-up
A robot changes color of eyes from yellow to green, close-up	a robot with yellow eyes, close-up	a robot with green eyes, close-up	a robot's eyes changing from yellow to green, close-up
the table lamp on the desk switches from green light to purple light	a lamp with green light on a desk	a lamp with purple light on a desk	a lamp's light changing from green to purple
a graffiti drawing appears on a blank wall	a blank wall	a wall with a graffiti drawing	a graffiti drawing appearing on the blank wall
a TV monitor changes screen color from white to red	a TV monitor with a white screen	a TV monitor with a red screen	a TV monitor's screen changing from white to red
a blank canvas is gradually filled with a beautiful painting	a blank canvas	a canvas with a beautiful painting	a painting gradually appearing on the canvas
a cold metal sword glowing red hot over a flame	a cold metal sword	a sword glowing red hot	a sword heating and glowing over a flame
the tea is brewed in a glass of clear water	a glass of clear water	a glass of brewed tea	tea brewing in clear water
a green jellyfish turns purple	a green jellyfish	a purple jellyfish	a jellyfish changing from green to purple
superman flies up from the ground	Superman on the ground	Superman in the air	Superman flying up from the ground
Person sits on the chair and then stands up	a person sitting on a chair	a person standing	a person standing up from the chair
a sitting cat stands up from the floor	a cat sitting on the floor	a standing cat	a cat standing up from the floor
Bird flies up from a branch	a bird on a branch	a bird in the air	a bird flying up from a branch
a standing woman sits in a chair	a woman standing	a woman sitting in a chair	a woman sitting down in a chair
A ball lying on the table falls down to the floor	a ball lying on a table	a ball on the floor	a ball falling from the table
the girl turns her head from the top to the bottom	a girl looking up	a girl looking down	a girl turning her head downwards
a man with a clean face applies clown makeup, close-up	a man with a clean face, close-up	a man with clown makeup, close-up	a man applying clown makeup, close-up
a girl stands straight and then raises her hands up, frontal view	a girl standing straight, frontal view	a girl with hands up, frontal view	a girl raising her hands, frontal view
a hot air balloon flying in the sky lands on the ground	a hot air balloon flying in the sky	a hot air balloon on the ground	a hot air balloon descending
a dog lies on the grass and then stands up	a dog lying on the grass	a dog standing	a dog standing up from the grass
a standing cat lies down on the lawn	a cat standing on the lawn	a cat lying on the lawn	a cat lying down on the lawn
a man picks up a box from the ground	a box on the ground	a man holding a box	a man picking up a box
a flying bird lands on the branch	a bird flying in the air	a bird on a branch	a bird landing on a branch
the rocket takes off from the ground	a rocket on the ground	a rocket in the sky	a rocket taking off
a bee flies in the air and lands on a growing flower	a bee flying in the air	a bee on a growing flower	a bee landing on a flower
a kangaroo jumps off the lawn	a kangaroo on the lawn	a kangaroo in the air	a kangaroo jumping off the lawn
A gopher peeks out of a burrow in the ground and then hides underground	a gopher underground	a gopher hiding underground	a gopher peeking out of a burrow
A dolphin peering above the surface of the water hides underwater	a dolphin underwater	a dolphin hiding underwater	a dolphin peering above the water
a tiger jumps into a clearing in the jungle	a tiger in the jungle	a tiger in a clearing	a tiger jumping into a clearing
A stormtrooper enters an empty room	an empty room	a stormtrooper in a room	a stormtrooper entering a room
First, an empty room is shown, Darth Vader walks in it	an empty room	Darth Vader in a room	Darth Vader walking into a room
A ladybug sitting on a flower flies away	a ladybug on a flower	a flower without a ladybug	a ladybug flying away from a flower
First, an empty hat is shown, then a rabbit peeks out of the hat	an empty hat	a rabbit in a hat	a rabbit peeking out of a hat
First, an empty foxhole is shown, then a fox crawls out of his hole	an empty foxhole	a fox outside a foxhole	a fox crawling out of a foxhole
a woman walks into a house	a woman outside a house	a woman inside a house	a woman walking into a house
the apple is covered with a handkerchief	an uncovered apple	an apple covered with a handkerchief	an apple being covered by a handkerchief
