# Supplementary material
Source: ML conference proceedings conference paper supplement (https://openreview.net/forum?id=zkGxROm7D3)
Supplement: supplementary_material [file Prompts_I2V.xlsx]

## Sheet: Prompts
Prompt	Model	img_path
A fawn's first steps in a forest clearing, watched by its mother	Atomovideo	001_A_fawn's_first_steps_in_a_forest_clearing,_watched_by_its_mother.jpg
A lighthouse is beaming over turbulent seas at night	Atomovideo	002_A_lighthouse_is_beaming_over_turbulent_seas_at_night.jpg
A panda standing on a surfboard, in the ocean in sunset, 4k	Atomovideo	003_A_panda_standing_on_a_surfboard,_in_the_ocean_in_sunset,_4k.jpg
Astronaut, wading through ocean waves, digital painting	Atomovideo	004_Astronaut,_wading_through_ocean_waves,_digital_painting.jpg
Cartoon of Lily giggling and blowing bubbles in a sunny meadow	Atomovideo	005_Cartoon_of_Lily_giggling_and_blowing_bubbles_in_a_sunny_meadow.jpg
Crowds are watching spellbound as fireworks explode overhead, in cartoon style	Atomovideo	006_Crowds_are_watching_spellbound_as_fireworks_explode_overhead,_in_cartoon_style.jpg
Flying through an intense battle between pirate ships in a stormy ocean	Atomovideo	007_Flying_through_an_intense_battle_between_pirate_ships_in_a_stormy_ocean.jpg
Lonely cowboy, strumming, old west street, vivid, vintage	Atomovideo	008_Lonely_cowboy,_strumming,_old_west_street,_vivid,_vintage.jpg
Oil painting-style image of a panda experimenting in a magical garden	Atomovideo	009_Oil_painting-style_image_of_a_panda_experimenting_in_a_magical_garden.jpg
Pixel art of a knight doing magic in a hidden lab	Atomovideo	010_Pixel_art_of_a_knight_doing_magic_in_a_hidden_lab.jpg
Simba is standing in front of the frame	Atomovideo	011_Simba_is_standing_in_front_of_the_frame.jpg
Volcanic eruption, tropical landscape, fiery skies, palm trees	Atomovideo	012_Volcanic_eruption,_tropical_landscape,_fiery_skies,_palm_trees.jpg
Waves are crashing against a rocky shoreline	Atomovideo	013_Waves_are_crashing_against_a_rocky_shoreline.jpg
a stack of dried leaves burning in a forest	Atomovideo	014_a_stack_of_dried_leaves_burning_in_a_forest.jpg
close up video of strawberry plant	Atomovideo	015_close_up_video_of_strawberry_plant.jpg
ferry under bridge on river near city in malaysia	Atomovideo	016_ferry_under_bridge_on_river_near_city_in_malaysia.jpg
fireworks display in the sky at night	Atomovideo	017_fireworks_display_in_the_sky_at_night.jpg
jetliner breaking through clouds	Atomovideo	018_jetliner_breaking_through_clouds.jpg
living room with party decoration	Atomovideo	019_living_room_with_party_decoration.jpg
pug, in skateboard, on the road	Atomovideo	020_pug,_in_skateboard,_on_the_road.jpg
a beautiful woman with long hair and a dress blowing in the wind	DynamiCrafter	021_a_beautiful_woman_with_long_hair_and_a_dress_blowing_in_the_wind.jpg
a boat traveling on the ocean	DynamiCrafter	022_a_boat_traveling_on_the_ocean.jpg
a bonfire is lit in the middle of a field	DynamiCrafter	023_a_bonfire_is_lit_in_the_middle_of_a_field.jpg
a brown bear is walking in a zoo enclosure, some rocks around	DynamiCrafter	024_a_brown_bear_is_walking_in_a_zoo_enclosure,_some_rocks_around.jpg
a campfire on the beach and the ocean waves in the background	DynamiCrafter	025_a_campfire_on_the_beach_and_the_ocean_waves_in_the_background.jpg
a group of penguins walking on a beach	DynamiCrafter	026_a_group_of_penguins_walking_on_a_beach.jpg
a man in an astronaut suit playing a guitar	DynamiCrafter	027_a_man_in_an_astronaut_suit_playing_a_guitar.jpg
a robot is walking through a destroyed city	DynamiCrafter	028_a_robot_is_walking_through_a_destroyed_city.jpg
a sailboat sailing in rough seas with a dramatic sunset	DynamiCrafter	029_a_sailboat_sailing_in_rough_seas_with_a_dramatic_sunset.jpg
a woman looking out in the rain	DynamiCrafter	030_a_woman_looking_out_in_the_rain.jpg
bear playing guitar happily, snowing	DynamiCrafter	031_bear_playing_guitar_happily,_snowing.jpg
boy walking on the street	DynamiCrafter	032_boy_walking_on_the_street.jpg
fireworks display	DynamiCrafter	033_fireworks_display.jpg
girl talking and blinking	DynamiCrafter	034_girl_talking_and_blinking.jpg
girl with fires and smoke on his head	DynamiCrafter	035_girl_with_fires_and_smoke_on_his_head.jpg
pouring beer into a glass of ice and beer	DynamiCrafter	036_pouring_beer_into_a_glass_of_ice_and_beer.jpg
pouring honey onto some slices of bread	DynamiCrafter	037_pouring_honey_onto_some_slices_of_bread.jpg
riding a bike under a bridge	DynamiCrafter	038_riding_a_bike_under_a_bridge.jpg
rotating view, small house	DynamiCrafter	039_rotating_view,_small_house.jpg
time-lapse of a blooming flower on a stem	DynamiCrafter	040_time-lapse_of_a_blooming_flower_on_a_stem.jpg
time-lapse of a blooming flower with leaves and a stem	DynamiCrafter	041_time-lapse_of_a_blooming_flower_with_leaves_and_a_stem.jpg
two people dancing	DynamiCrafter	042_two_people_dancing.jpg
Satellite flies across the globe	EMUVideo	043_Satellite_flies_across_the_globe.jpg
The American flag waving during the moon landing with the camera panning	EMUVideo	044_The_American_flag_waving_during_the_moon_landing_with_the_camera_panning.jpg
The sun sets and the moon rises	EMUVideo	045_The_sun_sets_and_the_moon_rises.jpg
horse moving its legs	EMUVideo	046_horse_moving_its_legs.jpg
A cute cat pirat is sufing on the sea, it raises its hands and dances on the board, the waves are surging	PixelsDance	047_A_cute_cat_pirat_is_sufing_on_the_sea,_it_raises_its_hands_and_dances_on_the_board,_the_waves_are_surging.jpg
A happy panda is playing guitar and singing loudly, music symbols are slowly generated from the guitar and floating in the sky	PixelsDance	048_A_happy_panda_is_playing_guitar_and_singing_loudly,_music_symbols_are_slowly_generated_from_the_guitar_and_floating_in_the_sky.jpg
A kawaii squirrel is surfing and dancing on the board	PixelsDance	049_A_kawaii_squirrel_is_surfing_and_dancing_on_the_board.jpg
An angry Godzilla is roaring and raising hands, big fire is burning and bombs are exploding in the background	PixelsDance	050_An_angry_Godzilla_is_roaring_and_raising_hands,_big_fire_is_burning_and_bombs_are_exploding_in_the_background.jpg
Batman and ironman are dancing	PixelsDance	051_Batman_and_ironman_are_dancing.jpg
Blue flowers grow out from the skull slowly	PixelsDance	052_Blue_flowers_grow_out_from_the_skull_slowly.jpg
Boy walking in the street, butterflies flying	PixelsDance	053_Boy_walking_in_the_street,_butterflies_flying.jpg
Coloful powder exploding	PixelsDance	054_Coloful_powder_exploding.jpg
Cyberpunk man riding a horsethrough the street, pink light, slowly	PixelsDance	055_Cyberpunk_man_riding_a_horsethrough_the_street,_pink_light,_slowly.jpg
Girl rotate head slowly, smiling, hair fluttering, leaves floating, slowly	PixelsDance	056_Girl_rotate_head_slowly,_smiling,_hair_fluttering,_leaves_floating,_slowly.jpg
Mini batman surfing on the sea, batman dancing on the boarrd, waves surging high	PixelsDance	057_Mini_batman_surfing_on_the_sea,_batman_dancing_on_the_boarrd,_waves_surging_high.jpg
Rotate, rotate around the golden rabbit model	PixelsDance	058_Rotate,_rotate_around_the_golden_rabbit_model.jpg
The battleship is firing, bombs exploding	PixelsDance	059_The_battleship_is_firing,_bombs_exploding.jpg
The boat is floating on the sea, waves are surging	PixelsDance	060_The_boat_is_floating_on_the_sea,_waves_are_surging.jpg
The cat in a coat is slowly raising its hand to salute, salute	PixelsDance	061_The_cat_in_a_coat_is_slowly_raising_its_hand_to_salute,_salute.jpg
The comic girl dancing on the road, hair is futtering, petal floating and falling down, fireworks exploding in the remote	PixelsDance	062_The_comic_girl_dancing_on_the_road,_hair_is_futtering,_petal_floating_and_falling_down,_fireworks_exploding_in_the_remote.jpg
The comic girl walking along the road, hair is futtering, petal floating and falling down	PixelsDance	063_The_comic_girl_walking_along_the_road,_hair_is_futtering,_petal_floating_and_falling_down.jpg
The cyber metal tiger is riding a motorcycle across the street, fast speed, cyberpunk street, dark, light	PixelsDance	064_The_cyber_metal_tiger_is_riding_a_motorcycle_across_the_street,_fast_speed,_cyberpunk_street,_dark,_light.jpg
The cyber metal tiger is roaring and walking, blue light, cyberpunk street, dark, light	PixelsDance	065_The_cyber_metal_tiger_is_roaring_and_walking,_blue_light,_cyberpunk_street,_dark,_light.jpg
The girl is laughing, hair fluttering, butterfly is flying	PixelsDance	066_The_girl_is_laughing,_hair_fluttering,_butterfly_is_flying.jpg
The girl is smiling and winking, hair fluttering	PixelsDance	067_The_girl_is_smiling_and_winking,_hair_fluttering.jpg
The girl is thinking, hair is fluttering, birds flying in the sky	PixelsDance	068_The_girl_is_thinking,_hair_is_fluttering,_birds_flying_in_the_sky.jpg
The skull is burining, red fires, the skull exploding	PixelsDance	069_The_skull_is_burining,_red_fires,_the_skull_exploding.jpg
Two jedi cats are fighting with each other in the forest	PixelsDance	070_Two_jedi_cats_are_fighting_with_each_other_in_the_forest.jpg
A beautiful 3D girl	i2vgen-xl	071_A_beautiful_3D_girl.jpg
A blonde girl in jeans	i2vgen-xl	072_A_blonde_girl_in_jeans.jpg
A car is on the road	i2vgen-xl	073_A_car_is_on_the_road.jpg
A close-up of a parrot	i2vgen-xl	074_A_close-up_of_a_parrot.jpg
A couple of cabins in the snowy woods	i2vgen-xl	075_A_couple_of_cabins_in_the_snowy_woods.jpg
A cute kitten in the grass, 3D cartoon	i2vgen-xl	076_A_cute_kitten_in_the_grass,_3D_cartoon.jpg
A cute little girl smiling at the camera, 2D culture	i2vgen-xl	077_A_cute_little_girl_smiling_at_the_camera,_2D_culture.jpg
A dog in a suit and tie faces the camera	i2vgen-xl	078_A_dog_in_a_suit_and_tie_faces_the_camera.jpg
A dreamy garden with a city in the distance	i2vgen-xl	079_A_dreamy_garden_with_a_city_in_the_distance.jpg
A fighter jet in outer space	i2vgen-xl	080_A_fighter_jet_in_outer_space.jpg
A girl in a silver mech	i2vgen-xl	081_A_girl_in_a_silver_mech.jpg
A girl with yellow hair and black clothes stood in front of the camera	i2vgen-xl	082_A_girl_with_yellow_hair_and_black_clothes_stood_in_front_of_the_camera.jpg
A girl with yellow hair was wearing a yellow ball suit in front of the cage	i2vgen-xl	083_A_girl_with_yellow_hair_was_wearing_a_yellow_ball_suit_in_front_of_the_cage.jpg
A green frog floats on the surface of the water on green lotus leaves, with several pink lotus flowers, in a Chinese painting style	i2vgen-xl	084_A_green_frog_floats_on_the_surface_of_the_water_on_green_lotus_leaves,_with_several_pink_lotus_flowers,_in_a_Chinese_painting_style.jpg
A kitten in flowers, Chinese painting	i2vgen-xl	085_A_kitten_in_flowers,_Chinese_painting.jpg
A lonely tiger walks by the sea, at sunset, 2D culture	i2vgen-xl	086_A_lonely_tiger_walks_by_the_sea,_at_sunset,_2D_culture.jpg
A male model faces the camera with his eyes closed, surrounded by lotus flowers	i2vgen-xl	087_A_male_model_faces_the_camera_with_his_eyes_closed,_surrounded_by_lotus_flowers.jpg
A man's face has a flashing circuit light path	i2vgen-xl	088_A_man's_face_has_a_flashing_circuit_light_path.jpg
A monster was sitting on a house on the side of the street , with its head pointed at the people in the street	i2vgen-xl	089_A_monster_was_sitting_on_a_house_on_the_side_of_the_street_,_with_its_head_pointed_at_the_people_in_the_street.jpg
A moon on the sea	i2vgen-xl	090_A_moon_on_the_sea.jpg
A red woodcut bird	i2vgen-xl	091_A_red_woodcut_bird.jpg
A slim girl dancing	i2vgen-xl	092_A_slim_girl_dancing.jpg
A small boat floating on the calm water, 3D cartoon	i2vgen-xl	093_A_small_boat_floating_on_the_calm_water,_3D_cartoon.jpg
A song in space in space	i2vgen-xl	094_A_song_in_space_in_space.jpg
A winged dog flying over the city	i2vgen-xl	095_A_winged_dog_flying_over_the_city.jpg
A yellow robot	i2vgen-xl	096_A_yellow_robot.jpg
A zombie old man with white hair stood on the podium with his hands raised	i2vgen-xl	097_A_zombie_old_man_with_white_hair_stood_on_the_podium_with_his_hands_raised.jpg
Blue Chinese ink painting , several lit candles on the water , the whole blue style	i2vgen-xl	098_Blue_Chinese_ink_painting_,_several_lit_candles_on_the_water_,_the_whole_blue_style.jpg
Chinese ink painting , two boats and two coconut trees by the sea	i2vgen-xl	099_Chinese_ink_painting_,_two_boats_and_two_coconut_trees_by_the_sea.jpg
Colorful underwater world, 3D cartoon	i2vgen-xl	100_Colorful_underwater_world,_3D_cartoon.jpg
Deep-sea shark	i2vgen-xl	101_Deep-sea_shark.jpg
Deer in the sunset	i2vgen-xl	102_Deer_in_the_sunset.jpg
Evening waterfall	i2vgen-xl	103_Evening_waterfall.jpg
Goldfish in Chinese ink painting style for a few days	i2vgen-xl	104_Goldfish_in_Chinese_ink_painting_style_for_a_few_days.jpg
Holding a crystal ball in both hands , the crystal ball reflects the tall buildings of a city	i2vgen-xl	105_Holding_a_crystal_ball_in_both_hands_,_the_crystal_ball_reflects_the_tall_buildings_of_a_city.jpg
In a rice field , a girl walks toward the eye of the storm with her back to the camera	i2vgen-xl	106_In_a_rice_field_,_a_girl_walks_toward_the_eye_of_the_storm_with_her_back_to_the_camera.jpg
In the living room, there is a gold-red banana shaped sofa with throw pillows	i2vgen-xl	107_In_the_living_room,_there_is_a_gold-red_banana_shaped_sofa_with_throw_pillows.jpg
Papers were floating in the air on a table in the library	i2vgen-xl	108_Papers_were_floating_in_the_air_on_a_table_in_the_library.jpg
Rough seas	i2vgen-xl	109_Rough_seas.jpg
Three Wolf pups walk towards the camera through the snow	i2vgen-xl	110_Three_Wolf_pups_walk_towards_the_camera_through_the_snow.jpg
Waterfall in the forest	i2vgen-xl	111_Waterfall_in_the_forest.jpg
