# Supplementary material
Source: ML conference proceedings conference paper supplement (https://openreview.net/forum?id=zkGxROm7D3)
Supplement: supplementary_material [file Prompts_II2V xlsx.xlsx]

## Sheet: Лист 1 - Prompts_II2V
Prompts_II2V
prompt	category	img1_path	img2_path
a lama turns head	Animation	./MorphBench/Animation/alpaca_0.png	./MorphBench/Animation/alpaca_1.png
a boy and a girl turn their heads	Animation	./MorphBench/Animation/boy_and_girl_0.png	./MorphBench/Animation/boy_and_girl_1.png
a lamp becomes bigger	Animation	./MorphBench/Animation/bulb_0.png	./MorphBench/Animation/bulb_1.png
a pile of panceckes becomes bigger	Animation	./MorphBench/Animation/cake_0.png	./MorphBench/Animation/cake_1.png
a chair transforms into another chair	Animation	./MorphBench/Animation/chair_0.png	./MorphBench/Animation/chair_1.png
cocktail glass changes shape	Animation	./MorphBench/Animation/cocktail_0.png	./MorphBench/Animation/cocktail_1.png
an anime girl turns head	Animation	./MorphBench/Animation/counterfeit_0.png	./MorphBench/Animation/counterfeit_1.png
a statue turns head	Animation	./MorphBench/Animation/david_0.png	./MorphBench/Animation/david_1.png
a dog jumps	Animation	./MorphBench/Animation/dog_jump_0.png	./MorphBench/Animation/dog_jump_1.png
a standing dog sits down	Animation	./MorphBench/Animation/dog_sit_0.png	./MorphBench/Animation/dog_sit_1.png
a dog in a glasses turns his head	Animation	./MorphBench/Animation/drag_dog_0.png	./MorphBench/Animation/drag_dog_1.png
an anime girl turns her head	Animation	./MorphBench/Animation/drag_girl_0.png	./MorphBench/Animation/drag_girl_1.png
a girl turns her head	Animation	./MorphBench/Animation/drag_realgirl_0.png	./MorphBench/Animation/drag_realgirl_1.png
a stature turns head	Animation	./MorphBench/Animation/drag_sculp_0.png	./MorphBench/Animation/drag_sculp_1.png
A goose opens its mouth	Animation	./MorphBench/Animation/duck_0.png	./MorphBench/Animation/duck_1.png
a mountain grows	Animation	./MorphBench/Animation/fuji_0.png	./MorphBench/Animation/fuji_1.png
a cake changes color	Animation	./MorphBench/Animation/imagic_cake_0.png	./MorphBench/Animation/imagic_cake_1.png
a statue turns head	Animation	./MorphBench/Animation/laser_sculp_0.png	./MorphBench/Animation/laser_sculp_1.png
a bird spreads its wings	Animation	./MorphBench/Animation/masa_bird_0.png	./MorphBench/Animation/masa_bird_1.png
a boy in glasses starts smiling	Animation	./MorphBench/Animation/masa_boy_0.png	./MorphBench/Animation/masa_boy_1.png
an old man starts smiling	Animation	./MorphBench/Animation/masa_oldman_0.png	./MorphBench/Animation/masa_oldman_1.png
a mashroom grows	Animation	./MorphBench/Animation/mushroom_0.png	./MorphBench/Animation/mushroom_1.png
the ocean shore is changing shape	Animation	./MorphBench/Animation/scene_0.png	./MorphBench/Animation/scene_1.png
the woman in the painting turns her head	Animation	./MorphBench/Animation/woman_0.png	./MorphBench/Animation/woman_1.png
Elon Musk turns into Fei Fei Li	Metamorphosis	./MorphBench/Metamorphosis/Musk_Feifei_0.png	./MorphBench/Metamorphosis/Musk_Feifei_1.png
Elon Musk turns into Barack Obama	Metamorphosis	./MorphBench/Metamorphosis/Musk_Obama_0.png	./MorphBench/Metamorphosis/Musk_Obama_1.png
Elon Musk turns into Donald Trump	Metamorphosis	./MorphBench/Metamorphosis/Musk_Trump_0.png	./MorphBench/Metamorphosis/Musk_Trump_1.png
Barack Obama turns into Donald Trump	Metamorphosis	./MorphBench/Metamorphosis/Obama_Trump_0.png	./MorphBench/Metamorphosis/Obama_Trump_1.png
Donald Trump turns into Joe Biden	Metamorphosis	./MorphBench/Metamorphosis/Trump_Biden_0.png	./MorphBench/Metamorphosis/Trump_Biden_1.png
Enakin Skywalker turns into Darth Vader	Metamorphosis	./MorphBench/Metamorphosis/anakin_0.png	./MorphBench/Metamorphosis/anakin_1.png
a girl turns into cartoon girl	Metamorphosis	./MorphBench/Metamorphosis/arya_0.png	./MorphBench/Metamorphosis/arya_1.png
one boy turns into another	Metamorphosis	./MorphBench/Metamorphosis/boy01_0.png	./MorphBench/Metamorphosis/boy01_1.png
one boy turns into another	Metamorphosis	./MorphBench/Metamorphosis/boy02_0.png	./MorphBench/Metamorphosis/boy02_1.png
one boy turns into another	Metamorphosis	./MorphBench/Metamorphosis/boy03_0.png	./MorphBench/Metamorphosis/boy03_1.png
one boy turns into another	Metamorphosis	./MorphBench/Metamorphosis/boy12_0.png	./MorphBench/Metamorphosis/boy12_1.png
one boy turns into another	Metamorphosis	./MorphBench/Metamorphosis/boy13_0.png	./MorphBench/Metamorphosis/boy13_1.png
one boy turns into another	Metamorphosis	./MorphBench/Metamorphosis/boy23_0.png	./MorphBench/Metamorphosis/boy23_1.png
a boy turns into a girl	Metamorphosis	./MorphBench/Metamorphosis/boy_girl_0_0.png	./MorphBench/Metamorphosis/boy_girl_0_1.png
a boy turns into a girl	Metamorphosis	./MorphBench/Metamorphosis/boy_girl_1_0.png	./MorphBench/Metamorphosis/boy_girl_1_1.png
a boy turns into a girl	Metamorphosis	./MorphBench/Metamorphosis/boy_girl_2_0.png	./MorphBench/Metamorphosis/boy_girl_2_1.png
a boy turns into a girl	Metamorphosis	./MorphBench/Metamorphosis/boy_girl_3_0.png	./MorphBench/Metamorphosis/boy_girl_3_1.png
a pile of pancakes turns into a burger	Metamorphosis	./MorphBench/Metamorphosis/cake_burger_0.png	./MorphBench/Metamorphosis/cake_burger_1.png
a red car turns into a grey car	Metamorphosis	./MorphBench/Metamorphosis/carr_cars_0.png	./MorphBench/Metamorphosis/carr_cars_1.png
a grey sport car turns into a grey crossover	Metamorphosis	./MorphBench/Metamorphosis/cars_van_0.png	./MorphBench/Metamorphosis/cars_van_1.png
a castle in daylight turns into a castle at sunset	Metamorphosis	./MorphBench/Metamorphosis/castle_0.png	./MorphBench/Metamorphosis/castle_1.png
a cat turns into a rabbit	Metamorphosis	./MorphBench/Metamorphosis/cat_rabbit_0.png	./MorphBench/Metamorphosis/cat_rabbit_1.png
a chair transform into a couch	Metamorphosis	./MorphBench/Metamorphosis/chair01_0.png	./MorphBench/Metamorphosis/chair01_1.png
a chair transform into an office chair	Metamorphosis	./MorphBench/Metamorphosis/chair02_0.png	./MorphBench/Metamorphosis/chair02_1.png
a chair transform into a kitchen chair	Metamorphosis	./MorphBench/Metamorphosis/chair03_0.png	./MorphBench/Metamorphosis/chair03_1.png
a couch transforms into an office chair	Metamorphosis	./MorphBench/Metamorphosis/chair12_0.png	./MorphBench/Metamorphosis/chair12_1.png
a couch transforms into a kitchen chair	Metamorphosis	./MorphBench/Metamorphosis/chair13_0.png	./MorphBench/Metamorphosis/chair13_1.png
an office chair transforms into a kitchen chair	Metamorphosis	./MorphBench/Metamorphosis/chair23_0.png	./MorphBench/Metamorphosis/chair23_1.png
one dog turns into another	Metamorphosis	./MorphBench/Metamorphosis/dog_0.png	./MorphBench/Metamorphosis/dog_1.png
a puppy dog turns into a wolf	Metamorphosis	./MorphBench/Metamorphosis/dog_wolf_0.png	./MorphBench/Metamorphosis/dog_wolf_1.png
Gandalf turns into Santa Claus	Metamorphosis	./MorphBench/Metamorphosis/gandalf_0.png	./MorphBench/Metamorphosis/gandalf_1.png
a girl turns head	Metamorphosis	./MorphBench/Metamorphosis/girl_0.png	./MorphBench/Metamorphosis/girl_1.png
a girl turns into another girl	Metamorphosis	./MorphBench/Metamorphosis/girl01_0.png	./MorphBench/Metamorphosis/girl01_1.png
a girl turns into another girl	Metamorphosis	./MorphBench/Metamorphosis/girl02_0.png	./MorphBench/Metamorphosis/girl02_1.png
a girl turns into another girl	Metamorphosis	./MorphBench/Metamorphosis/girl03_0.png	./MorphBench/Metamorphosis/girl03_1.png
a girl turns into another girl	Metamorphosis	./MorphBench/Metamorphosis/girl12_0.png	./MorphBench/Metamorphosis/girl12_1.png
a girl turns into another girl	Metamorphosis	./MorphBench/Metamorphosis/girl13_0.png	./MorphBench/Metamorphosis/girl13_1.png
a girl turns into another girl	Metamorphosis	./MorphBench/Metamorphosis/girl23_0.png	./MorphBench/Metamorphosis/girl23_1.png
one house transforms into another house	Metamorphosis	./MorphBench/Metamorphosis/house_left_0.png	./MorphBench/Metamorphosis/house_left_1.png
one house transforms into another house	Metamorphosis	./MorphBench/Metamorphosis/house_lr_0.png	./MorphBench/Metamorphosis/house_lr_1.png
one house transforms into another house	Metamorphosis	./MorphBench/Metamorphosis/house_right_0.png	./MorphBench/Metamorphosis/house_right_1.png
one man transforms into another	Metamorphosis	./MorphBench/Metamorphosis/jay_0.png	./MorphBench/Metamorphosis/jay_1.png
one man transforms into another	Metamorphosis	./MorphBench/Metamorphosis/leo_0.png	./MorphBench/Metamorphosis/leo_1.png
a lion transforms into a tiger	Metamorphosis	./MorphBench/Metamorphosis/lion_tiger_0.png	./MorphBench/Metamorphosis/lion_tiger_1.png
a portrait of man in hat transforms into Van Gogh portrait	Metamorphosis	./MorphBench/Metamorphosis/man_van_0.png	./MorphBench/Metamorphosis/man_van_1.png
one woman portrait transforms into another woman portrait	Metamorphosis	./MorphBench/Metamorphosis/mona_pearl_0.png	./MorphBench/Metamorphosis/mona_pearl_1.png
Barack Obama turns into Vladimir Putin	Metamorphosis	./MorphBench/Metamorphosis/obama_putin_0.png	./MorphBench/Metamorphosis/obama_putin_1.png
a pokemon turns into pikachu	Metamorphosis	./MorphBench/Metamorphosis/pika_0.png	./MorphBench/Metamorphosis/pika_1.png
one racoon transforms into another	Metamorphosis	./MorphBench/Metamorphosis/raccoon_0.png	./MorphBench/Metamorphosis/raccoon_1.png
a puppy turns into a cat	Metamorphosis	./MorphBench/Metamorphosis/realdog_cat_0.png	./MorphBench/Metamorphosis/realdog_cat_1.png
a red sport car turns into a casual red car	Metamorphosis	./MorphBench/Metamorphosis/red_car_0.png	./MorphBench/Metamorphosis/red_car_1.png
a movie poster turns into a painting	Metamorphosis	./MorphBench/Metamorphosis/scream_0.png	./MorphBench/Metamorphosis/scream_1.png
one statue turns into another	Metamorphosis	./MorphBench/Metamorphosis/sculp_0.png	./MorphBench/Metamorphosis/sculp_1.png
a daytime mountains lanscape turns into a night time mountains landscape	Metamorphosis	./MorphBench/Metamorphosis/snow_mountain_0.png	./MorphBench/Metamorphosis/snow_mountain_1.png
one woman turns into another	Metamorphosis	./MorphBench/Metamorphosis/taylor_yifei_0.png	./MorphBench/Metamorphosis/taylor_yifei_1.png
Thanos turns into Superman	Metamorphosis	./MorphBench/Metamorphosis/thanos_0.png	./MorphBench/Metamorphosis/thanos_1.png
one building turns into another	Metamorphosis	./MorphBench/Metamorphosis/thu_mit_0.png	./MorphBench/Metamorphosis/thu_mit_1.png
a grey car turns into a blue SUV	Metamorphosis	./MorphBench/Metamorphosis/van_jeep_0.png	./MorphBench/Metamorphosis/van_jeep_1.png
A Van Gogh portrait turns into a Mona Lisa	Metamorphosis	./MorphBench/Metamorphosis/van_mona_0.png	./MorphBench/Metamorphosis/van_mona_1.png
A Van Gogh portrait turns into a woman portrait	Metamorphosis	./MorphBench/Metamorphosis/van_pearl_0.png	./MorphBench/Metamorphosis/van_pearl_1.png
A Van Gogh portrait turns into another Van Gogh portrait	Metamorphosis	./MorphBench/Metamorphosis/van_self_0.png	./MorphBench/Metamorphosis/van_self_1.png
A Van Gogh portrait turns into another man portrait	Metamorphosis	./MorphBench/Metamorphosis/vangogh_0.png	./MorphBench/Metamorphosis/vangogh_1.png
A wave photo turns into wave pointing	Metamorphosis	./MorphBench/Metamorphosis/wave_0.png	./MorphBench/Metamorphosis/wave_1.png
man and woman sign turns into photo of man and woman	Metamorphosis	./MorphBench/Metamorphosis/wc_0.png	./MorphBench/Metamorphosis/wc_1.png
White house transforms into a church	Metamorphosis	./MorphBench/Metamorphosis/whitehouse_church_0.png	./MorphBench/Metamorphosis/whitehouse_church_1.png
a wolf turns into a tiger	Metamorphosis	./MorphBench/Metamorphosis/wolf_tiger_0.png	./MorphBench/Metamorphosis/wolf_tiger_1.png
